# Supplementary material for: Humic-like substances in fresh emissions of rice straw burning and in ambient aerosols in the Pearl River Delta Region, China
Source: Copernicus journal article supplement (doi:10.5194/acp-10-6487-2010), 2010-07-16
Supplement: Supplementary file [file acp-10-6487-2010-supplement.pdf]

Supplementary Material: ACP-2010-158

Humic-like substances in emissions of fresh rice straw burning and in ambient aerosols in the Pearl River Delta Region, China

Peng Lin, Guenter Engling, Jian Zhen Yu

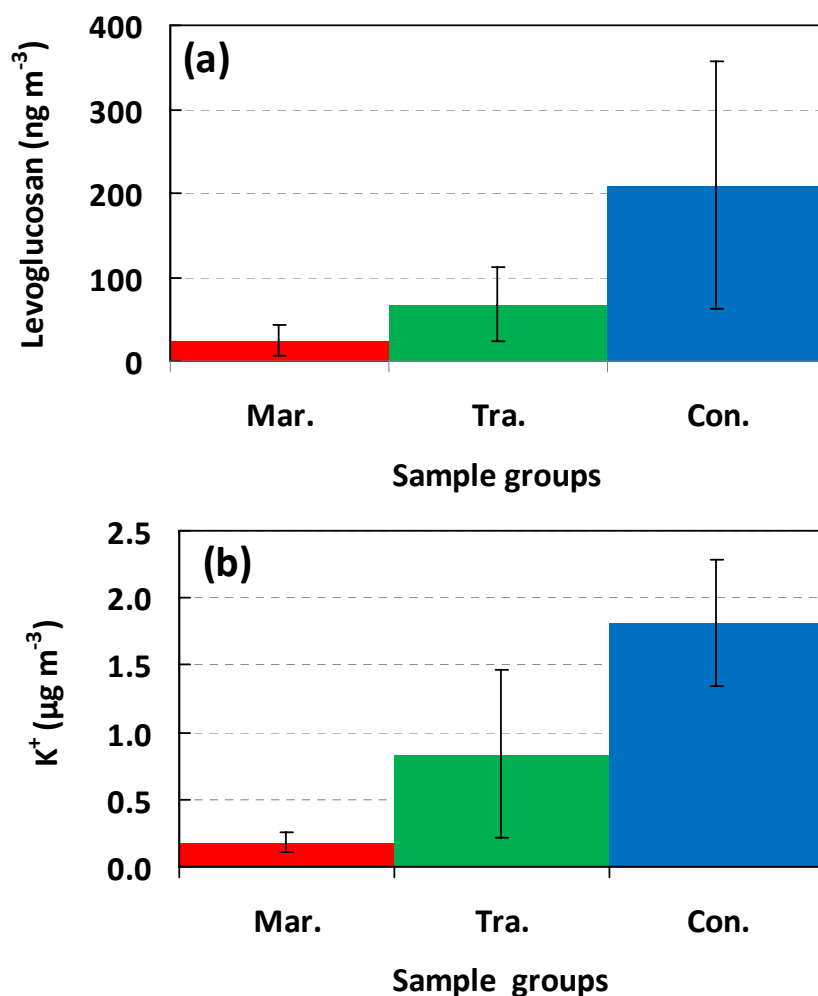

**Figure S1.** Concentrations of (a) levoglucosan and (b) K<sup>+</sup> in three groups of PM<sub>2.5</sub> samples influenced by air masses of marine, transition, and continental origin. These PM<sub>2.5</sub> samples were collected in Hong Kong from August 2004 to May 2005. The collection of these samples and measurements of K<sup>+</sup> and levoglucosan were reported in the paper by Wan and Yu (2007).

**Reference:**

Wan, E. C. H., and Yu, J. Z.: Analysis of sugars and sugar polyols in atmospheric aerosols by chloride attachment in liquid chromatography / negative ion electrospray mass spectrometry, *Environ. Sci. Technol.*, 41 (7), 2459-2466, 2007.
